# Supplementary material for: Heart failure drug proscillaridin A targets MYC overexpressing leukemia through global loss of lysine acetylation
Source: PubMed Central journal article supplement (PMC6563382; doi:10.1186/s13046-019-1242-8), 2019-06-13

**Figure S1**

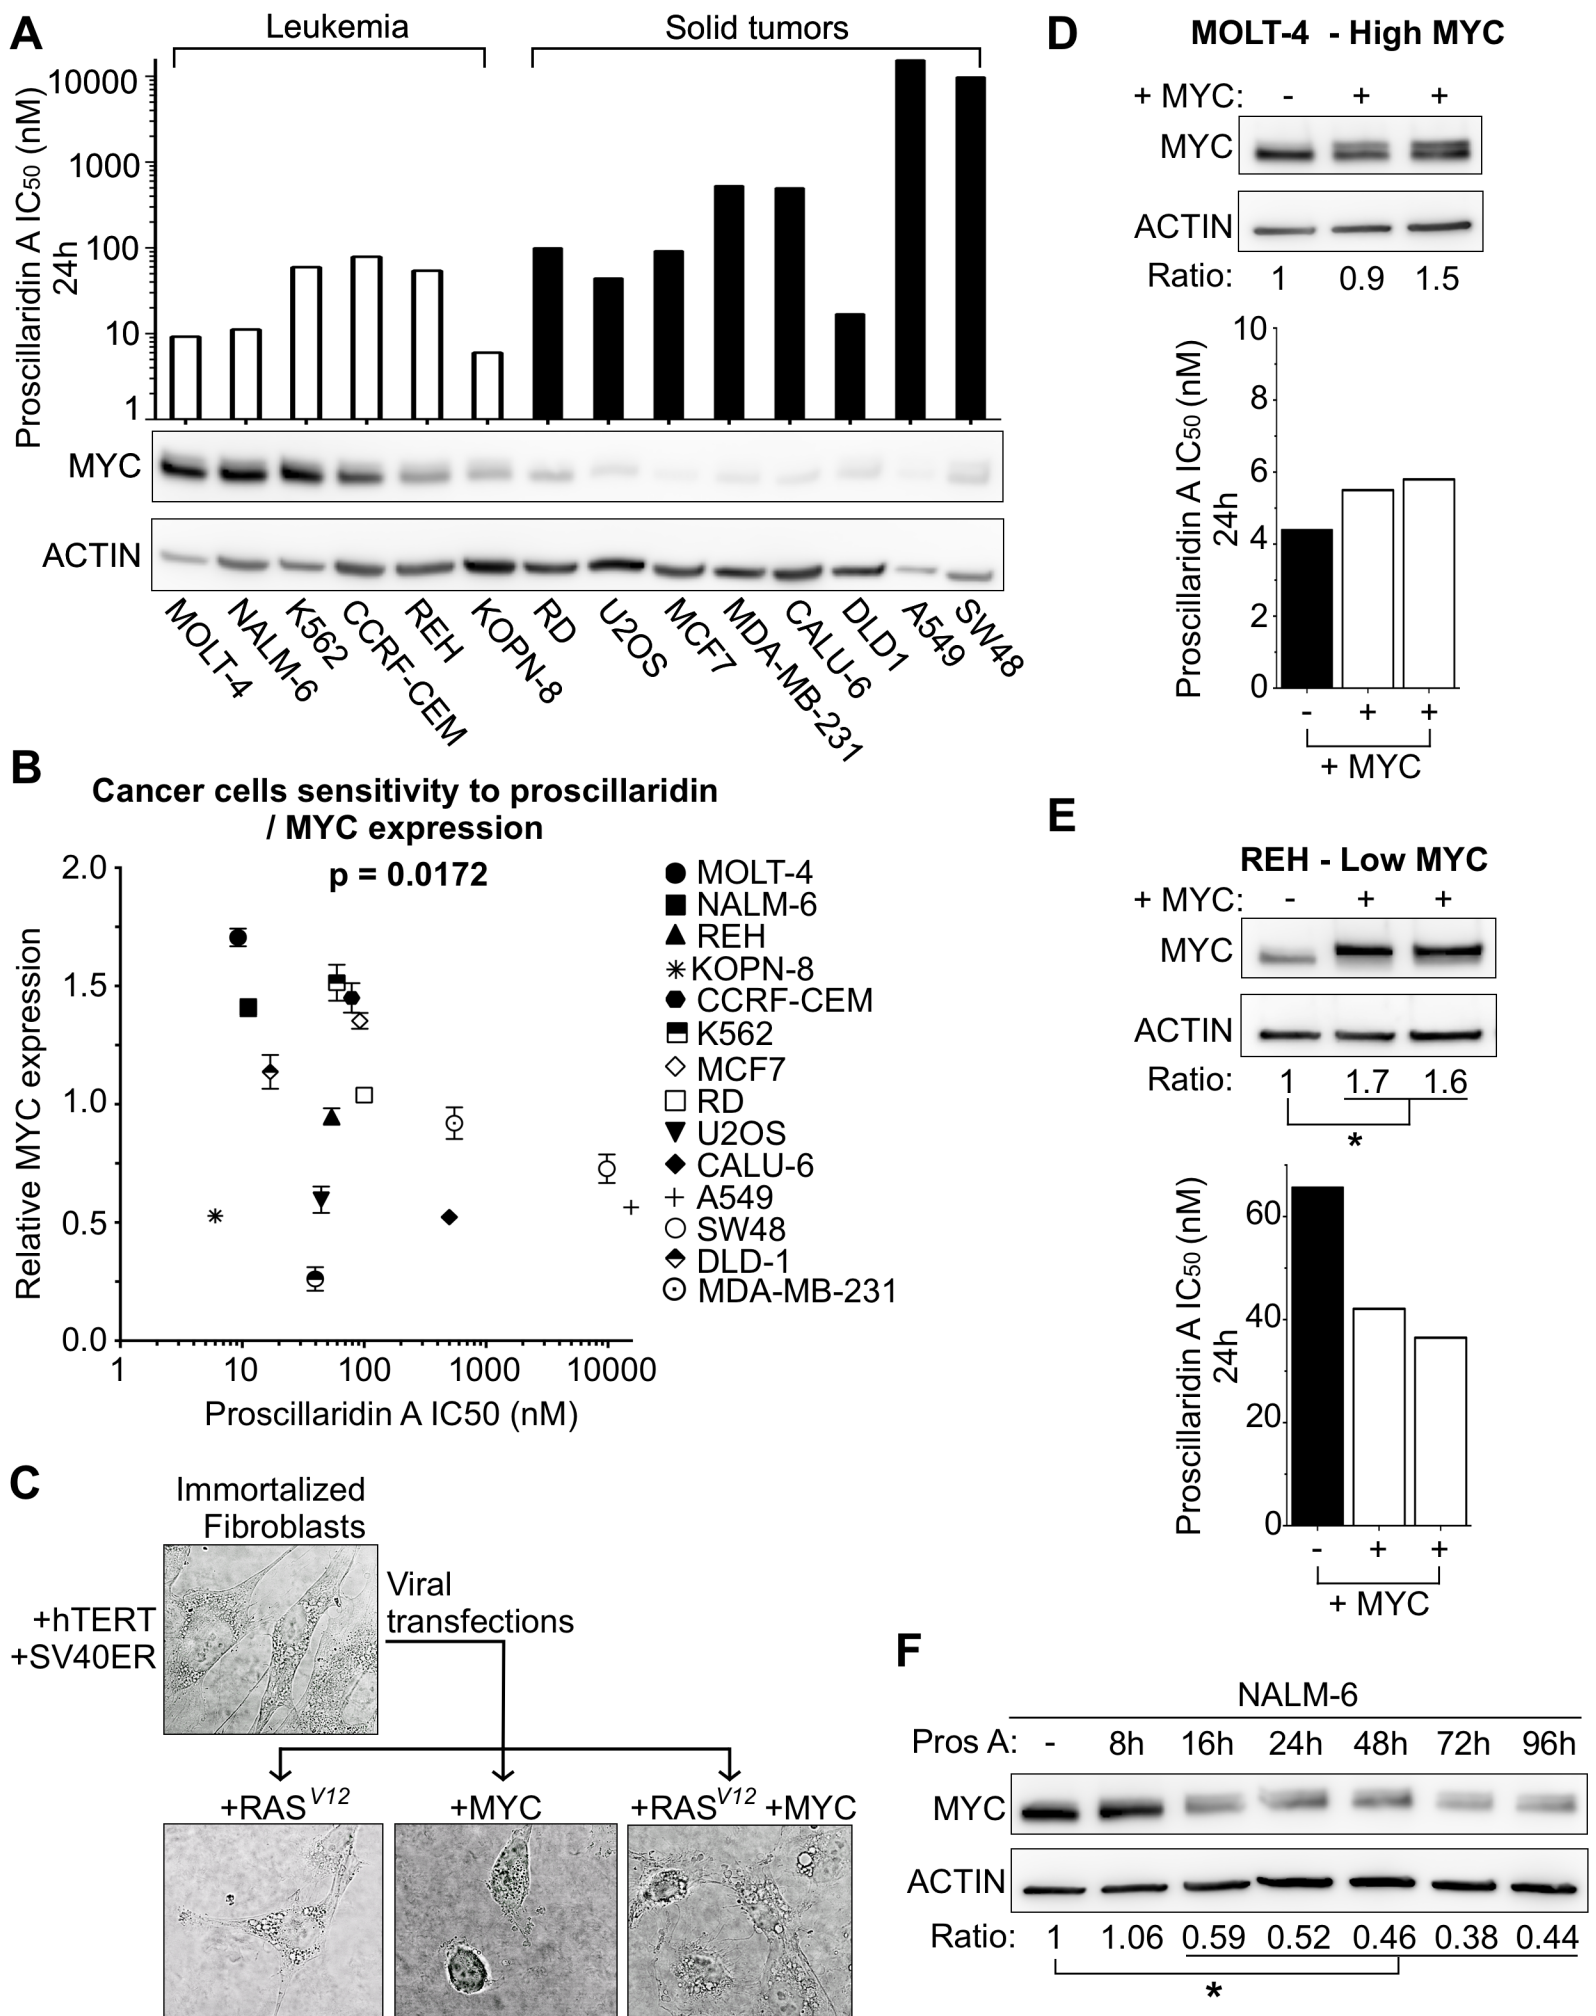

Supplement: 13046_2019_1242_MOESM2_ESM.pdf [file 13046_2019_1242_MOESM2_ESM.pdf]
