# Supplementary material for: Heart failure drug proscillaridin A targets MYC overexpressing leukemia through global loss of lysine acetylation
Source: PubMed Central journal article supplement (PMC6563382; doi:10.1186/s13046-019-1242-8), 2019-06-13

**Figure S4****A****MOLT-4**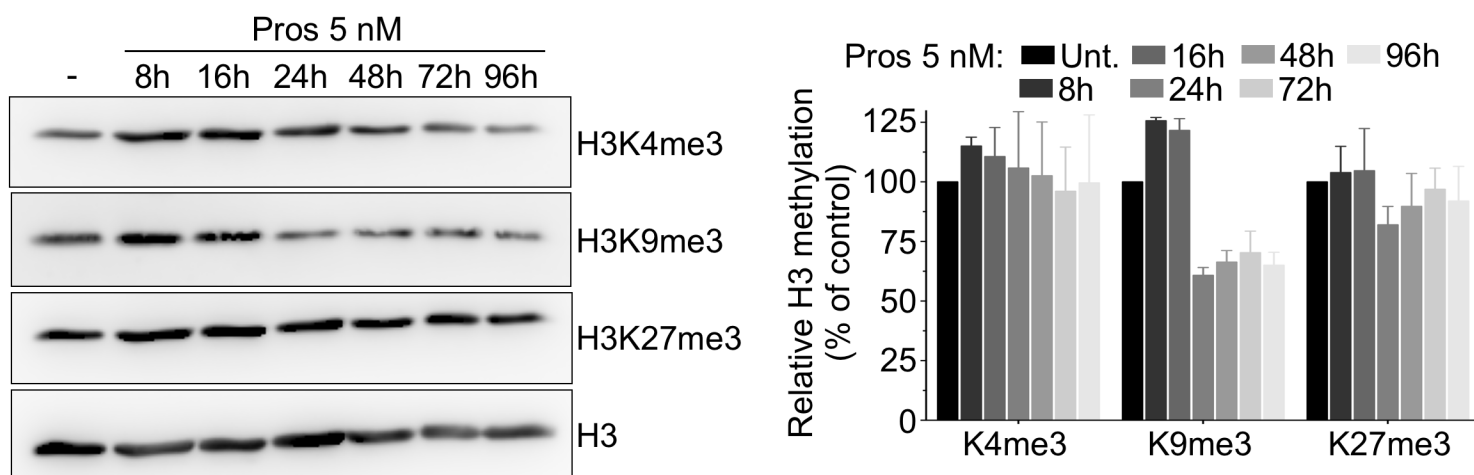**B****NALM-6**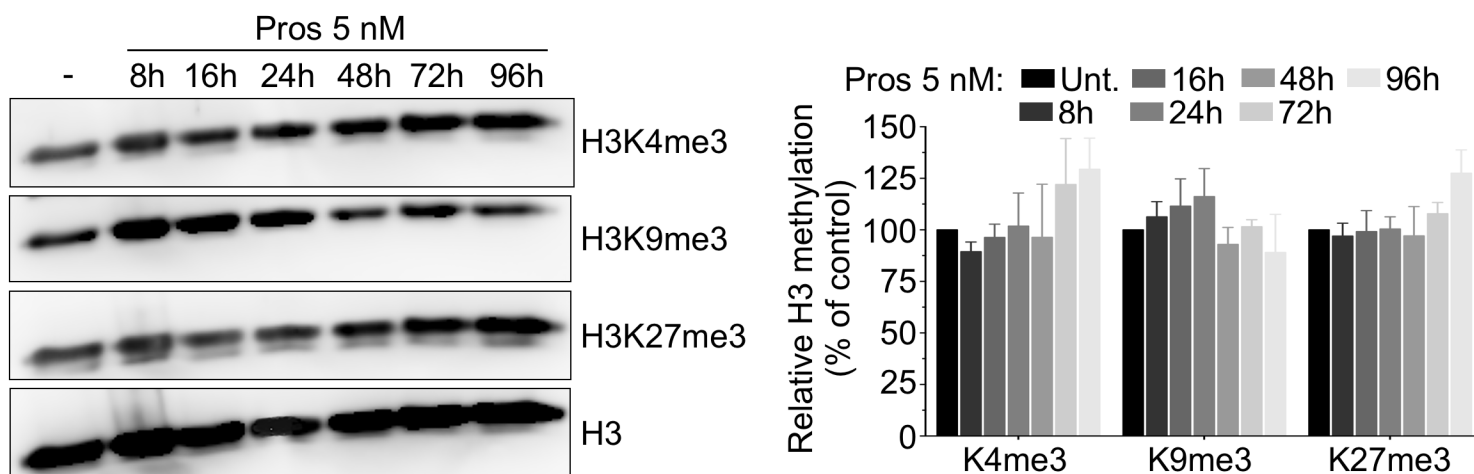**C****MOLT-4 - DAPI**

Pros A 5 nM:

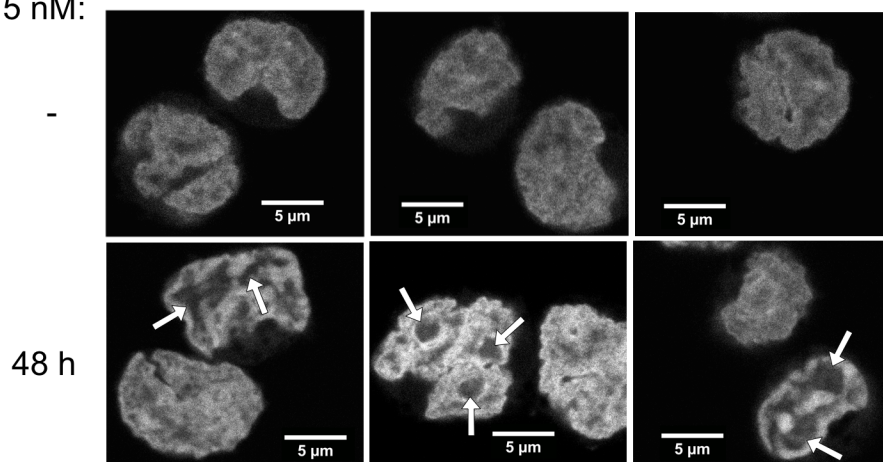

Supplement: 13046_2019_1242_MOESM5_ESM.pdf [file 13046_2019_1242_MOESM5_ESM.pdf]
