# Supplementary material for: Heart failure drug proscillaridin A targets MYC overexpressing leukemia through global loss of lysine acetylation
Source: PubMed Central journal article supplement (PMC6563382; doi:10.1186/s13046-019-1242-8), 2019-06-13

# Figure S5

**A**

GO of Pros A-induced downregulated genes whose promoters are marked by H3K27ac in untreated cells

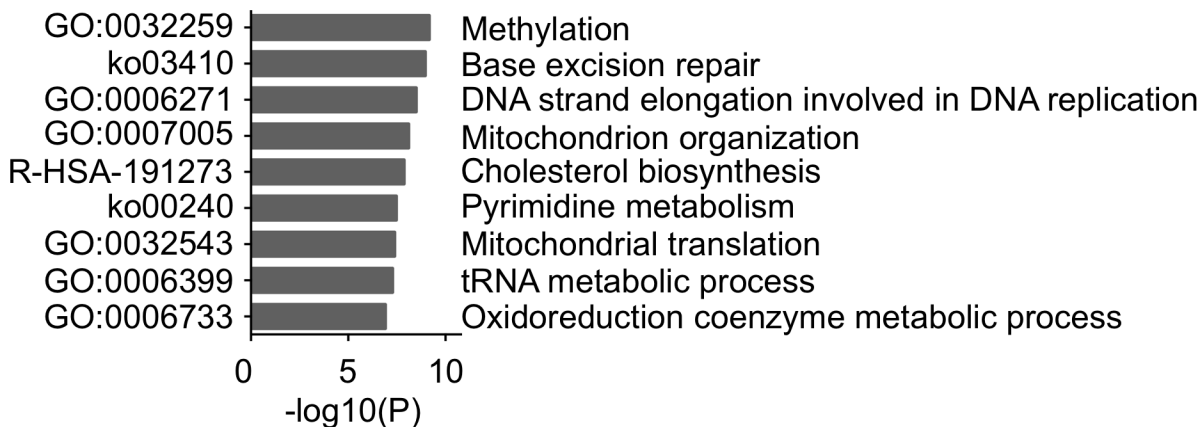

**B**

GO of Pros A-induced upregulated genes whose promoters are marked by H3K27ac in untreated cells

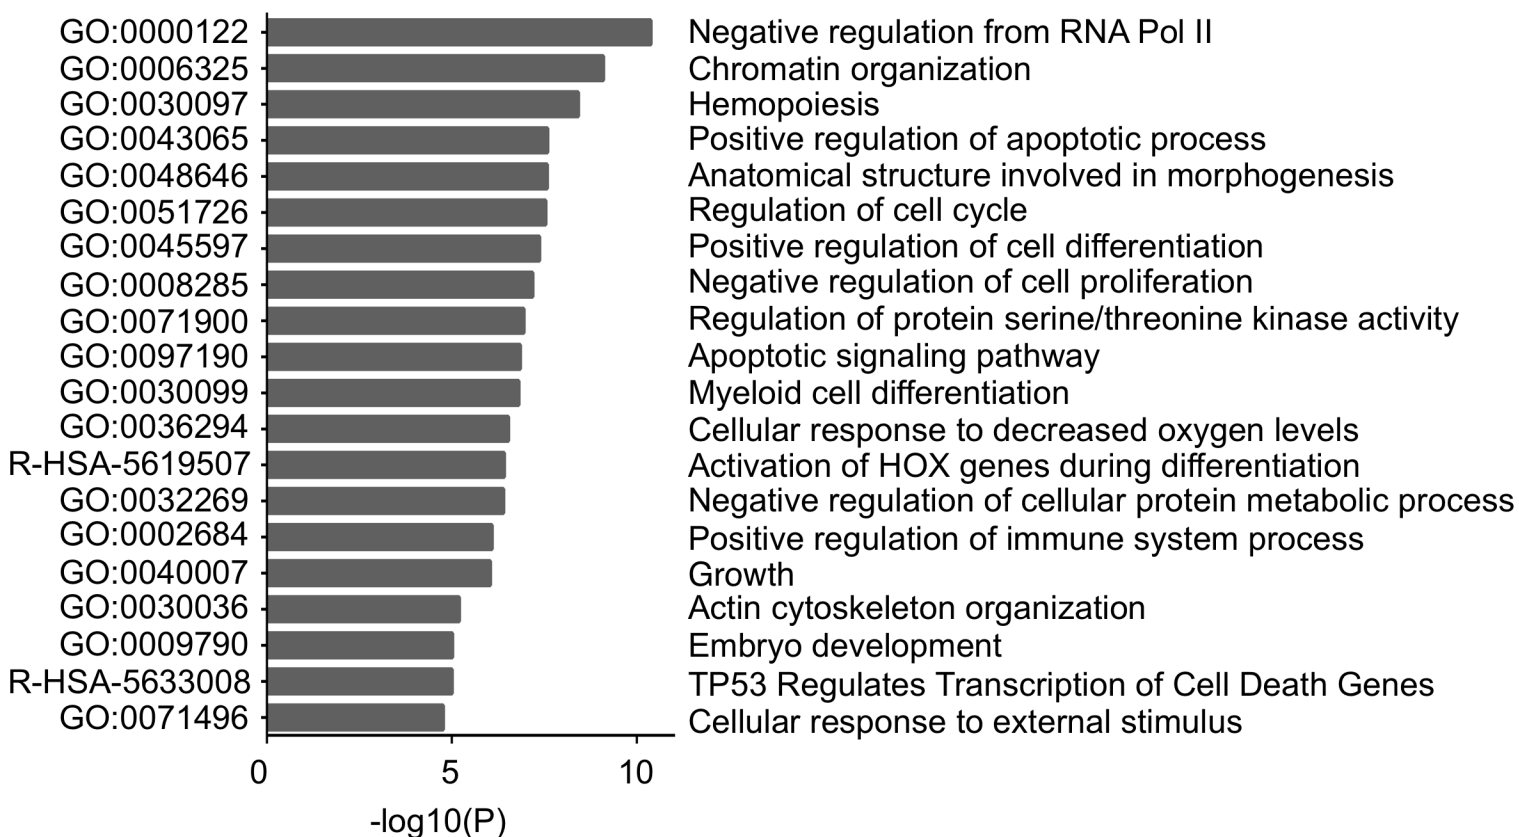

Supplement: 13046_2019_1242_MOESM6_ESM.pdf [file 13046_2019_1242_MOESM6_ESM.pdf]
