# Supplementary material for: Heart failure drug proscillaridin A targets MYC overexpressing leukemia through global loss of lysine acetylation
Source: PubMed Central journal article supplement (PMC6563382; doi:10.1186/s13046-019-1242-8), 2019-06-13

# Figure S6

## A

Map of co-expression pathways of MYC target genes downregulated by Pros A (5 nM; 48h) treatment and marked by H3K27ac in untreated cells

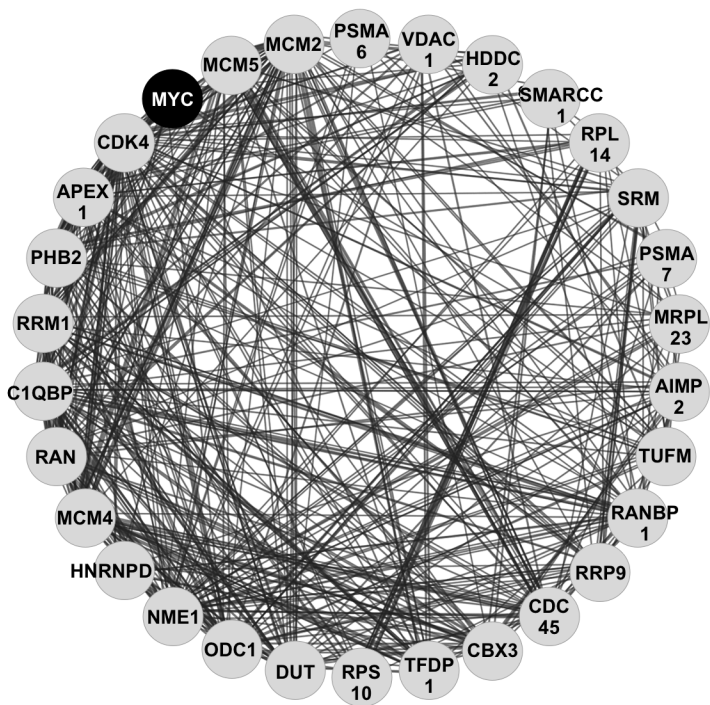

## B

Map of physical interactions of MYC target genes downregulated by Pros A (5nM; 48h) treatment and marked by H3K27ac in untreated cells

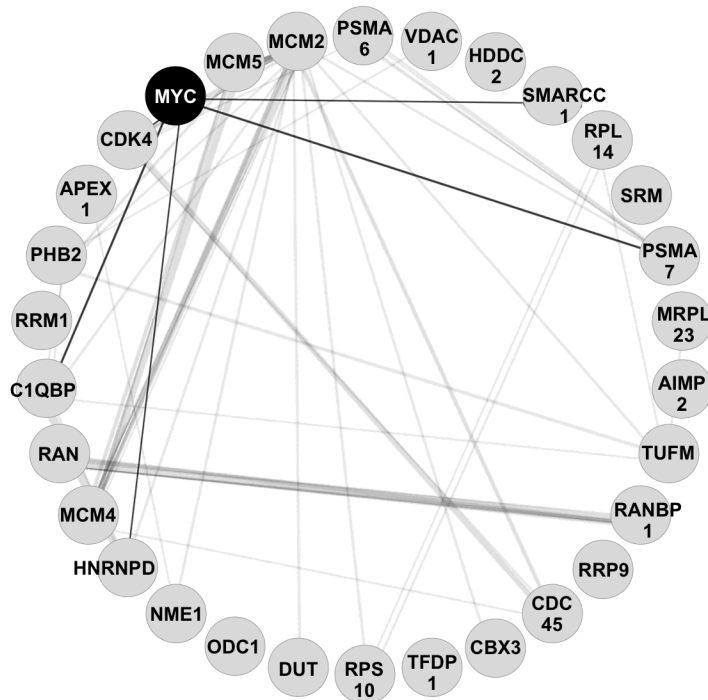

Supplement: 13046_2019_1242_MOESM7_ESM.pdf [file 13046_2019_1242_MOESM7_ESM.pdf]
