# Supplementary material for: Heart failure drug proscillaridin A targets MYC overexpressing leukemia through global loss of lysine acetylation
Source: PubMed Central journal article supplement (PMC6563382; doi:10.1186/s13046-019-1242-8), 2019-06-13

# Figure S7

**A**

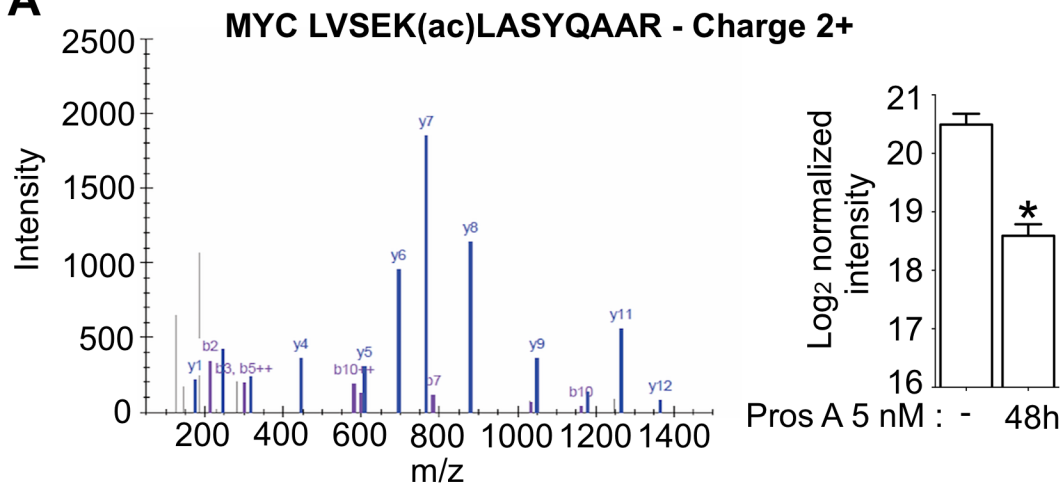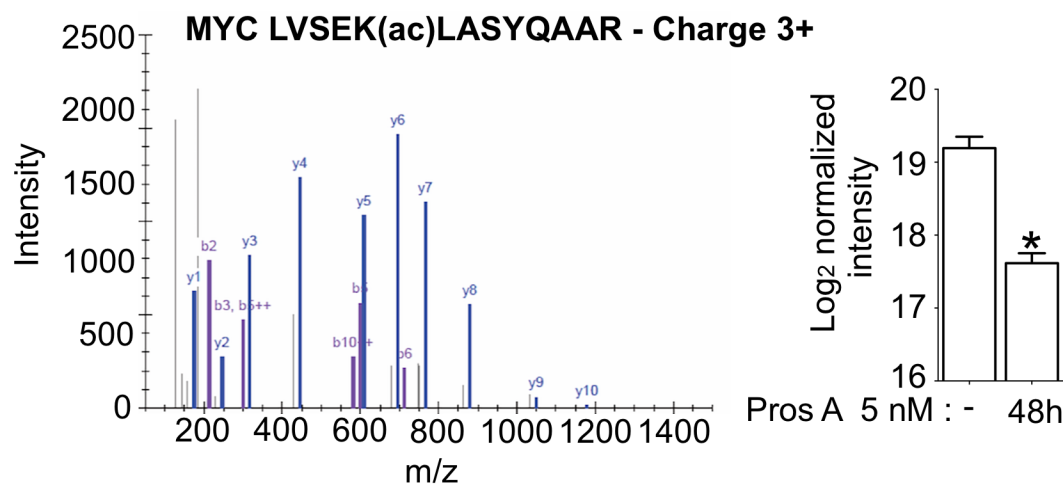

**B**

Map of co-expression pathways of MYC targets losing acetylation after Pros treatment

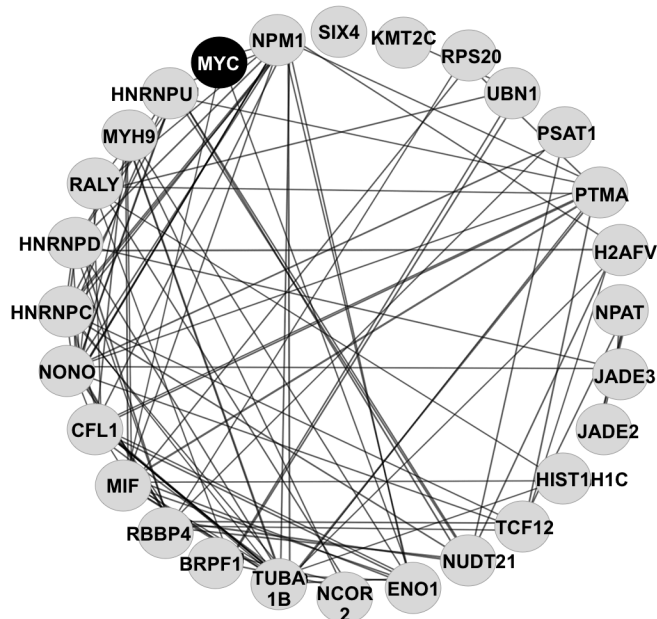

Supplement: 13046_2019_1242_MOESM8_ESM.pdf [file 13046_2019_1242_MOESM8_ESM.pdf]
