# Supplementary material for: Heart failure drug proscillaridin A targets MYC overexpressing leukemia through global loss of lysine acetylation
Source: PubMed Central journal article supplement (PMC6563382; doi:10.1186/s13046-019-1242-8), 2019-06-13

# Figure S8

**A**

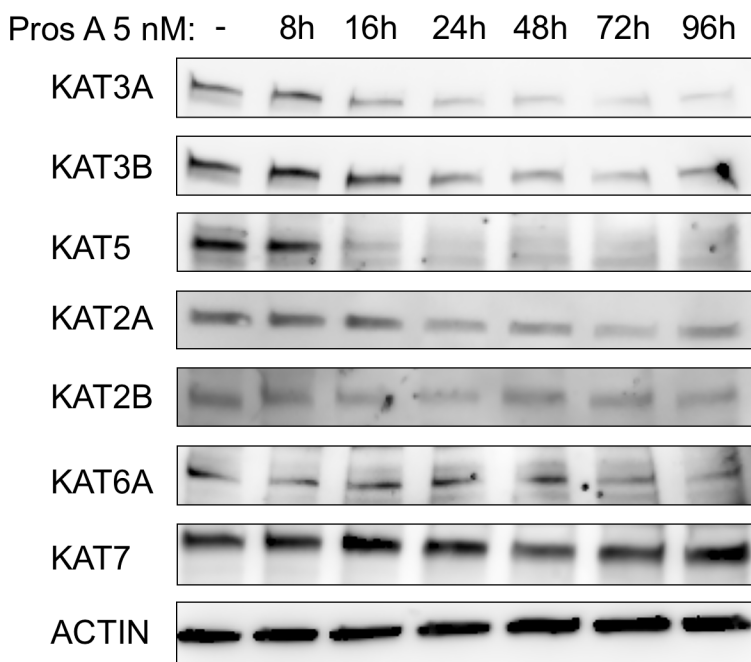

**B**

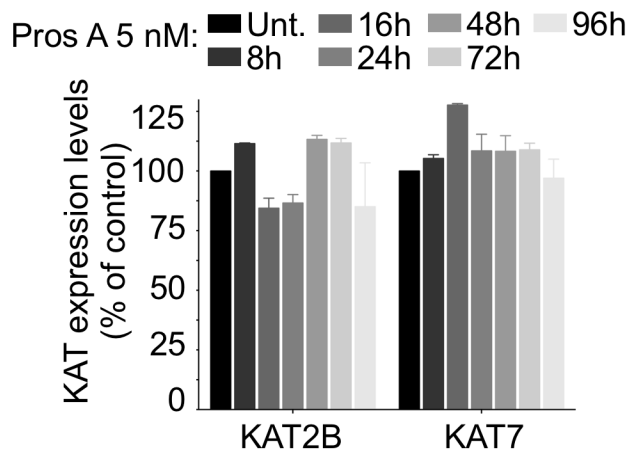

**C**

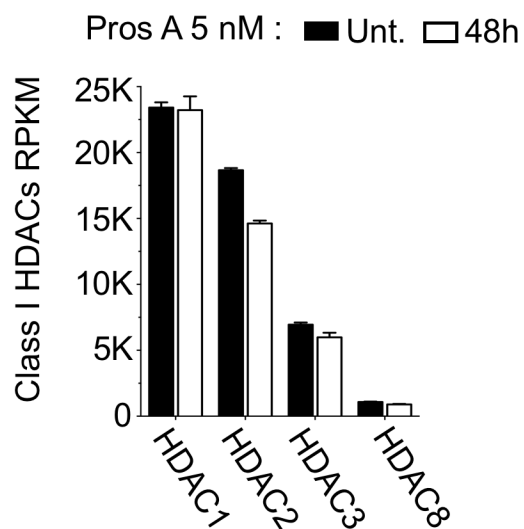

**D**

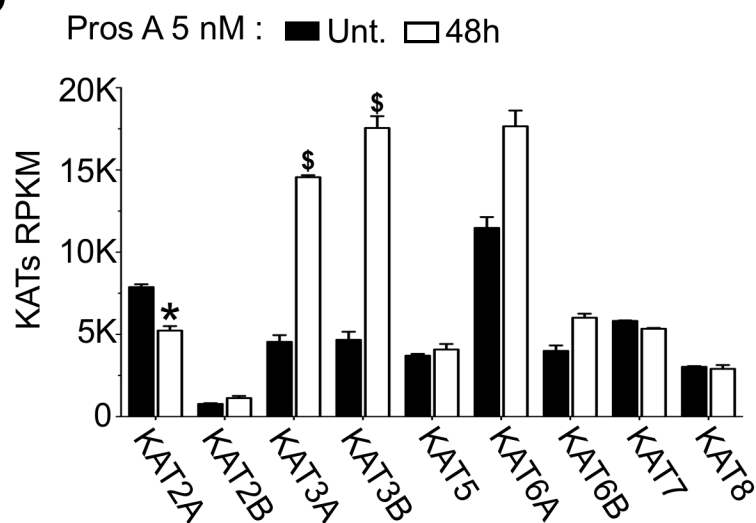

**E**

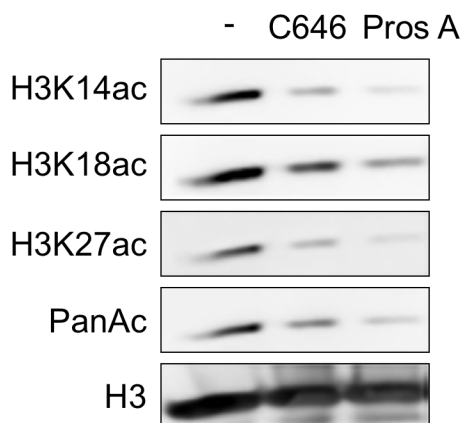

**F**

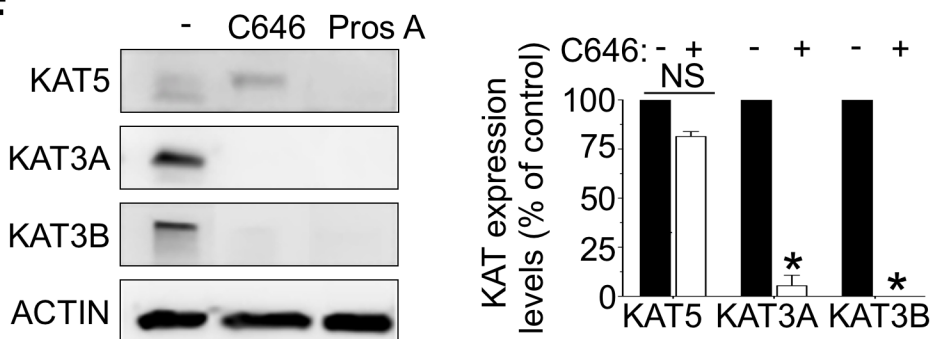

Supplement: 13046_2019_1242_MOESM9_ESM.pdf [file 13046_2019_1242_MOESM9_ESM.pdf]
